# Supplementary material for: Dextran stabilised hematite: a sustainable anode in aqueous electrolytes
Source: Royal Society of Chemistry journal article supplement (doi:10.1039/d4nr04897k), 2025-01-01
Supplement: d4nr04897k1.pdf [file d4nr04897k1.pdf]

## Dextran Stabilised Hematite: a sustainable anode in Aqueous Electrolytes

Sofia Panagiotidou<sup>a,§</sup>, Evangelia Vasilaki<sup>a,b,§,\*</sup>, Nikos Katsarakis<sup>c</sup>, Dimitra Vernardou<sup>c,\*</sup>, Maria Vamvakaki<sup>a,b</sup>

<sup>a</sup>Department of Materials Science and Engineering, University of Crete, 700 13  
Heraklion, Crete, Greece

<sup>b</sup>Institute of Electronic Structure and Laser, Foundation for Research and Technology  
– Hellas, 700 13 Heraklion, Crete, Greece

<sup>c</sup> Department of Electrical & Computer Engineering, School of Engineering, Hellenic  
Mediterranean University, Heraklion, 710 04 Crete, Greece

\* e-mail: [dvernardou@hmu.gr](mailto:dvernardou@hmu.gr), [evasilaki@iesl.forth.gr](mailto:evasilaki@iesl.forth.gr)

§These authors contributed equally.

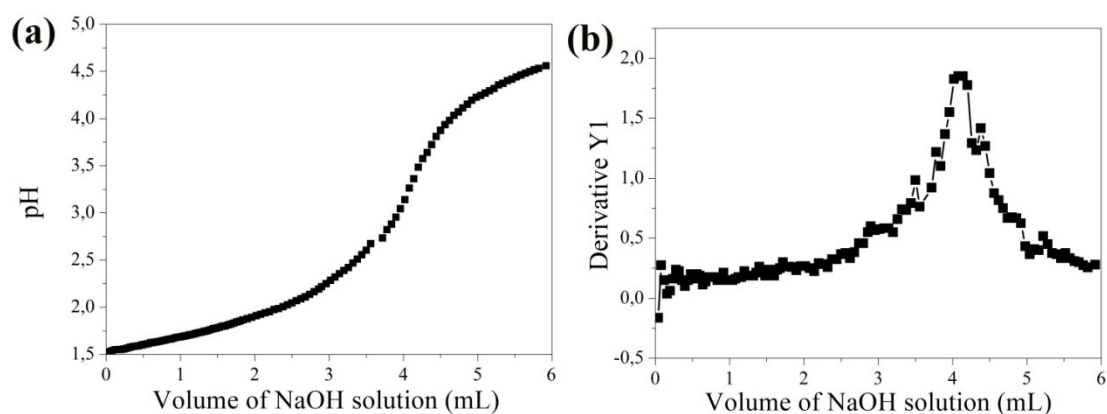

Fig. S1. Potentiometric titration curve of Ox-Dex (a) and first derivative of the titration curve (b).

Oxidation degree (%):

$$\frac{Mw \text{ of oxidized dextran repeat unit} * V_{NaOH} * C_{NaOH} * 10^{-3}}{\text{mass of oxidized dextran}} \quad \text{S1}$$

where  $V_{NaOH}$  is the consumed volume of NaOH solution (mL),  $C_{NaOH}$  is the concentration of NaOH solution in mol/L and the  $Mw$  of oxidized dextran repeat unit is 198,11 g/mol.

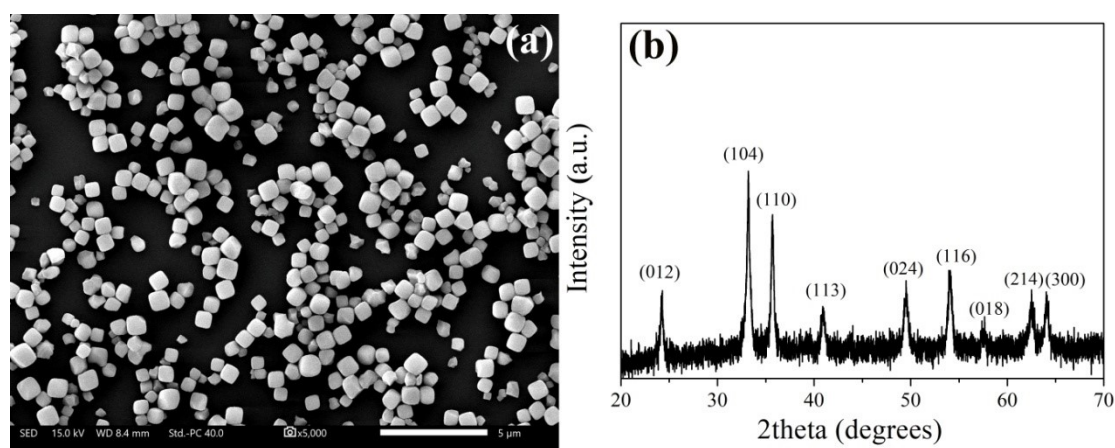

Fig. S2. FE-SEM image (a) and XRD pattern (b) of the  $\alpha$ - $Fe_2O_3$  particles.

$$D = \frac{K\lambda}{\beta \cos\theta} \quad \text{S2}$$

where  $D$  is the crystalline size,  $K$  denotes the Scherrer constant (0.98),  $\lambda$  corresponds to the X-ray wavelength,  $\beta$  denotes the full width at half maximum (FWHM) and  $\theta$  refers to the Bragg angle of the peak.

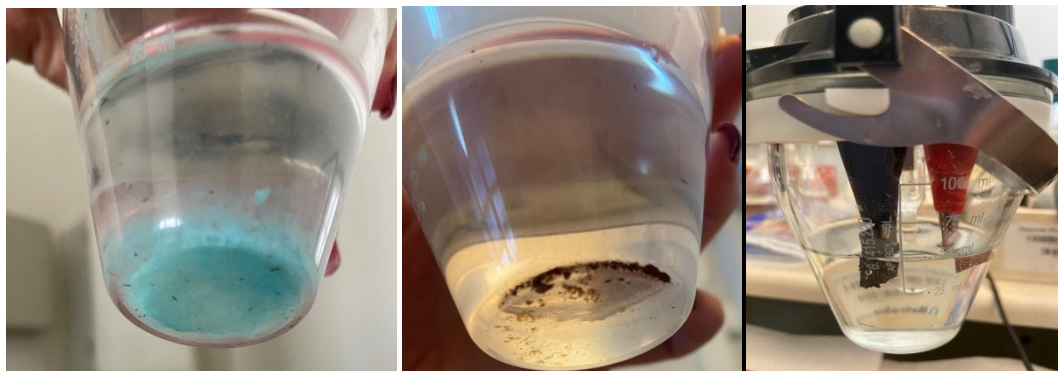

Fig. S3. Oxidation of the copper substrate (left), loss of material in the aqueous electrolyte (middle) due to electrolysis (right) on the surface of the bare  $\alpha$ - $\text{Fe}_2\text{O}_3$  electrode in  $\text{Li}_2\text{SO}_4$ .

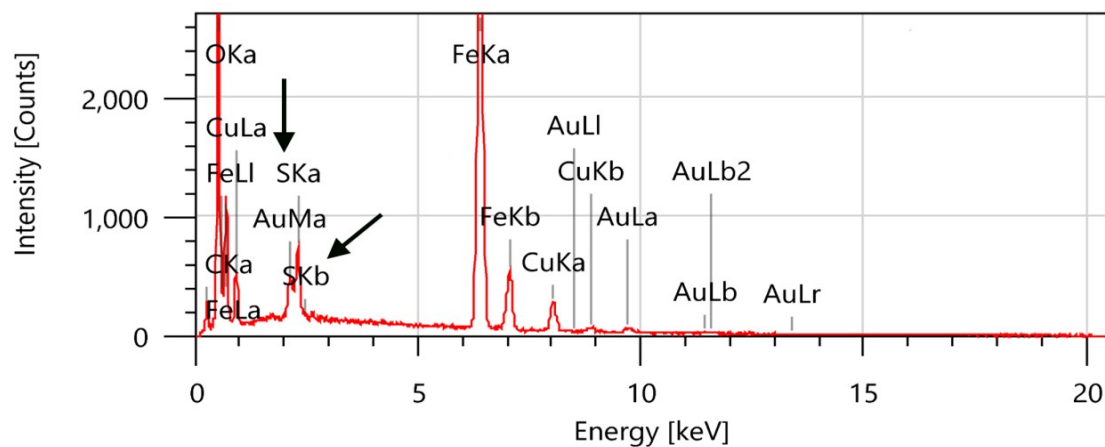

Fig. S4. EDS analysis of the hybrid  $\alpha$ - $\text{Fe}_2\text{O}_3$ /Ox-Dex electrode after 100 continuous intercalation/deintercalation scans in 1 M  $\text{ZnSO}_4$  electrolyte solution.
